# Supplementary material for: Reduced risk of prostate cancer in childless men as compared to fathers: a systematic review and meta-analysis
Source: PubMed Central journal article supplement (PMC4707492; doi:10.1038/srep19210), 2016-01-11

# Reduced risk of prostate cancer in childless men as compared to fathers: a systematic review and meta-analysis

Yeqing Mao, Xin Xu, Xiangyi Zheng, and Liping Xie

Supplementary Figure S1. Cumulative meta-analysis was performed based on publication year.

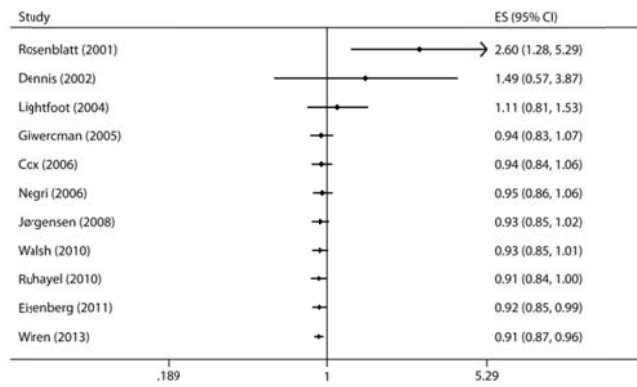

Supplement: srep19210-s1.pdf [file srep19210-s1.pdf]
